# Supplementary material for: Diversity of Rock-Inhabiting Fungi in Tarragona Province, Spain
Source: MDPI journal article supplement (doi:10.3390/jof10030170), 2024-02-22
Supplement: s1 [file s1]

**Table S1.** Geographical origin and sources, and *loci* sequenced and accession numbers (GenBank/EMBL) for their nucleotide sequences of the fungi isolated in this study.

| Species                                      | Strain    | Culture collection | Country | Sample*/ Isolation source                                                               | GenBank accession numbers |     |             |             |             | Reference  |
|----------------------------------------------|-----------|--------------------|---------|-----------------------------------------------------------------------------------------|---------------------------|-----|-------------|-------------|-------------|------------|
|                                              |           |                    |         |                                                                                         | ITS                       | LSU | <i>rpb2</i> | <i>tub2</i> | <i>tef1</i> |            |
| <i>Acremonium domschii</i>                   | FMR 19485 | -                  | Spain   | M4                                                                                      | OX431181                  | -   | -           | -           | -           | This study |
| <i>Acrophialophora</i> sp.                   | -         | -                  | Spain   | C3                                                                                      | -                         | -   | -           | -           | -           | This study |
| <i>Allophoma labilis</i>                     | FMR 18605 | -                  | Spain   | M4                                                                                      | -                         | -   | OY101427    | -           | -           | This study |
| <i>Allophoma labilis</i>                     | FMR 18606 | -                  | Spain   | M5                                                                                      | -                         | -   | OY101428    | -           | -           | This study |
| <i>Allophoma labilis</i>                     | FMR 18613 | -                  | Spain   | P2                                                                                      | -                         | -   | OX345722    | -           | -           | This study |
| <i>Allophoma labilis</i>                     | FMR 18621 | -                  | Spain   | R3                                                                                      | -                         | -   | OX345725    | -           | -           | This study |
| <i>Alternaria infectoria</i>                 | FMR 18710 | -                  | Spain   | P2                                                                                      | OX336879                  | -   | -           | -           | -           | This study |
| <i>Alternaria</i> spp.                       | -         | -                  | Spain   | C1, C2, C4, C5, M1, M2,<br>M3, M4, P1, P2, P3, P4,<br>P5, R1, R2, R4, R5, S1,<br>S3, S5 | -                         | -   | -           | -           | -           | This study |
| <i>Angustimassarina rosarum</i>              | FMR 18796 | -                  | Spain   | P4                                                                                      | -                         | -   | -           | -           | OX346378    | This study |
| <i>Apiospora marii</i>                       | FMR 18616 | -                  | Spain   | R1                                                                                      | OX336876                  | -   | -           | -           | -           | This study |
| <i>Aplosporella</i> sp.                      | -         | -                  | Spain   | R2                                                                                      | -                         | -   | -           | -           | -           | This study |
| <i>Arthrinium</i> spp.                       | -         | -                  | Spain   | C2, C5                                                                                  | -                         | -   | -           | -           | -           | This study |
| <i>Aspergillus</i> sect. <i>Nidulata</i>     | -         | -                  | Spain   | P4                                                                                      | -                         | -   | -           | -           | -           | This study |
| <i>Aspergillus</i> sect. <i>Nigri</i>        | -         | -                  | Spain   | R2, R3                                                                                  | -                         | -   | -           | -           | -           | This study |
| <i>Aspergillus</i> sect. <i>Versicolores</i> | -         | -                  | Spain   | C4                                                                                      | -                         | -   | -           | -           | -           | This study |
| <i>Aspergillus</i> sp.                       | -         | -                  | Spain   | S1                                                                                      | -                         | -   | -           | -           | -           | This study |
| <i>Aureobasidium pullulans</i>               | FMR 18808 | -                  | Spain   | S2                                                                                      | OX346306                  | -   | -           | -           | -           | This study |
| <i>Aureobasidium pullulans</i>               | FMR 19740 | -                  | Spain   | R3                                                                                      | OX346314                  | -   | -           | -           | -           | This study |
| <i>Aureobasidium pullulans</i>               | FMR 19755 | -                  | Spain   | R1                                                                                      | -                         | -   | OX346389    | -           | -           | This study |
| <i>Aureobasidium</i> spp.                    | -         | -                  | Spain   | P4, S2, S3, S5                                                                          | -                         | -   | -           | -           | -           | This study |
| <i>Beauveria pseudobassiana</i>              | FMR 18975 | -                  | Spain   | S1                                                                                      | -                         | -   | -           | -           | OX346387    | This study |
| <i>Beauveria</i> sp.                         | -         | -                  | Spain   | S2                                                                                      | -                         | -   | -           | -           | -           | This study |
| <i>Candida davisiana</i>                     | FMR 19484 | -                  | Spain   | M4                                                                                      | OX346398                  | -   | -           | -           | -           | This study |
| <i>Cladosporium</i> spp.                     | -         | -                  | Spain   | C1, C2, C4, C5, M1, M2,<br>M3, M4, M5, P1, P2, P3,                                      | -                         | -   | -           | -           | -           | This study |

| P4, P5, R1, R2, R3, R4,<br>S1, S2, S3, S4, S5 |           |                         |           |                        |           |          |          |          |            |            |
|-----------------------------------------------|-----------|-------------------------|-----------|------------------------|-----------|----------|----------|----------|------------|------------|
| <i>Clonostachys solani f. nigrovirens</i>     | FMR 19742 | -                       | Spain     | M4                     | OX346399  | -        | -        | -        | This study |            |
| <i>Coccodomyces pleosporus</i>                | FMR 18827 | CBS 149014 <sup>T</sup> | Spain     | S2                     | OW273979  | OW370575 | -        | -        | This study |            |
| <i>Coniochaeta leucoplaca</i>                 | FMR 18813 | -                       | Spain     | P5                     | -         | OX346308 | -        | -        | This study |            |
| <i>Coniosporium apollinis</i>                 | FMR 18714 | -                       | Spain     | C5                     | OX346304  | -        | -        | -        | This study |            |
| <i>Coniosporium uncinatum</i>                 | FMR 18792 | -                       | Spain     | P2                     | -         | -        | OX431254 | -        | This study |            |
| <i>Coniosporium uncinatum</i>                 | FMR 18794 | -                       | Spain     | S1                     | -         | -        | OX628948 | -        | This study |            |
| <i>Coniosporium uncinatum</i>                 | FMR 19658 | CBS 100219 <sup>T</sup> | France    | Stone                  | -         | -        | -        | -        | [108]      |            |
| <i>Cosmospora lavitskiae</i>                  | FMR 19486 | -                       | Spain     | R4                     | OX346313  | -        | -        | -        | This study |            |
| <i>Curvularia</i> sp.                         | -         | -                       | Spain     | S1                     | -         | -        | -        | -        | This study |            |
| <i>Cystofilobasidium capitatum</i>            | FMR 19756 | -                       | Spain     | R3                     | OX346400  | -        | -        | -        | This study |            |
| <i>Didymella glomerata</i>                    | FMR 18789 | -                       | Spain     | M4                     | -         | -        | OX346409 | -        | This study |            |
| <i>Didymella glomerata</i>                    | FMR 18805 | -                       | Spain     | P2                     | -         | -        | OX346380 | -        | This study |            |
| <i>Didymella microchlamydospora</i>           | FMR 18600 | -                       | Spain     | M1                     | -         | -        | OY101425 | -        | This study |            |
| <i>Didymella microchlamydospora</i>           | FMR 18626 | -                       | Spain     | R4                     | -         | -        | OX345728 | -        | This study |            |
| <i>Didymella pomorum</i>                      | FMR 18814 | -                       | Spain     | M4                     | -         | -        | OX346384 | -        | This study |            |
| <i>Didymella</i> sp.                          | -         | -                       | Spain     | M3                     | -         | -        | -        | -        | This study |            |
| <i>Dimorphoma saxea</i>                       | FMR 18611 | -                       | Spain     | C5                     | -         | -        | OX345720 | -        | This study |            |
| <i>Dimorphoma saxea</i>                       | FMR 18612 | -                       | Spain     | P1                     | -         | -        | OX345721 | -        | This study |            |
| <i>Dimorphoma saxea</i>                       | FMR 18614 | -                       | Spain     | P3                     | -         | -        | OX345723 | -        | This study |            |
| <i>Dimorphoma saxea</i>                       | FMR 18617 | -                       | Spain     | R1                     | OX336877  | -        | -        | -        | This study |            |
| <i>Dimorphoma saxea</i>                       | FMR 18628 | -                       | Spain     | R5                     | OX336878  | -        | -        | -        | This study |            |
| <i>Dothiora mahoniae</i>                      | FMR 19656 | CBS 264.92 <sup>T</sup> | USA       | <i>Mahonia repens</i>  | MH862357  | OX346371 | -        | -        | [109]      |            |
| <i>Dothiorella sarmentorum</i>                | FMR 18713 | -                       | Spain     | R1                     | OX336880  | -        | -        | -        | This study |            |
| <i>Epicoccum</i> spp.                         | -         | -                       | Spain     | C4, P1, R1, R5, S3, S5 | -         | -        | -        | -        | This study |            |
| <i>Exophiala caementiphila</i>                | FMR 18977 |                         | Spain     | S3                     | OX380503  | OX380504 | -        | OX380502 | OX380501   | This study |
| <i>Exophiala multiformis</i>                  | FMR 18809 | CBS 149013 <sup>T</sup> | Spain     | S2                     | OU624179  | OU624180 | -        | OU624443 | OU624442   | This study |
| <i>Exophiala xenobiotica</i>                  | FMR 18810 | -                       | Spain     | S2                     | OX346307  | -        | -        | -        | This study |            |
| <i>Exophiala xenobiotica</i>                  | FMR 18979 | -                       | Spain     | P2                     | OX346311  | -        | -        | -        | This study |            |
| <i>Exophiala xenobiotica</i>                  | FMR 19066 | -                       | Spain     | P5                     | OX346312  | -        | -        | -        | This study |            |
| <i>Exophiala xenobiotica</i>                  | FMR 19661 | CBS 118157 <sup>T</sup> | Venezuela | Oil sludge             | NR_111203 | -        | -        | -        | [30]       |            |
| <i>Fusarium acuminatum</i>                    | FMR 18812 | -                       | Spain     | S5                     | -         | -        | OX346383 | -        | This study |            |

|                                        |                  |                               |              |                                           |                 |                 |                 |                 |                 |            |
|----------------------------------------|------------------|-------------------------------|--------------|-------------------------------------------|-----------------|-----------------|-----------------|-----------------|-----------------|------------|
| <i>Fusarium babinda</i>                | FMR 18804        | -                             | Spain        | M4                                        | -               | -               | -               | -               | <b>OX346379</b> | This study |
| <i>Fusarium salinense</i>              | FMR 18620        | -                             | Spain        | R2                                        | -               | -               | -               | -               | <b>OX345724</b> | This study |
| <i>Fusarium</i> spp.                   | -                | -                             | Spain        | M1, M3, M4, P1, R1, R2,<br>R4, S5         | -               | -               | -               | -               | -               | This study |
| <i>Gonatobotryum apiculatum</i>        | FMR 20101        | CBS 182.68                    | Canada       | Soil under <i>Pinus strobus</i>           | <b>OX346374</b> | <b>OX346375</b> | -               | -               | -               | [110]      |
| <i>Juxtiphoma yunnanensis</i>          | FMR 18815        | -                             | Spain        | P2                                        | -               | -               | <b>OX346385</b> | -               | -               | This study |
| <i>Aureobasidium microstictum</i>      | FMR 19067        | -                             | Spain        | S2                                        | -               | -               | <b>OX346388</b> | -               | -               | This study |
| <i>Knufia epidermidis</i>              | FMR 18978        | -                             | Spain        | S3                                        | <b>OX346310</b> | -               | -               | -               | -               | This study |
| <i>Knufia perfecta</i>                 | FMR 18715        | -                             | Spain        | C5                                        | <b>OX346305</b> | -               | -               | -               | -               | This study |
| <i>Lithohypha guttulata</i>            | FMR 18791        | -                             | Spain        | P2                                        | <b>OX431178</b> | <b>OX431179</b> | -               | <b>OX431253</b> | <b>OX431252</b> | This study |
| <i>Lithophila guttulata</i>            | FMR 20100        | CBS 139723 <sup>f</sup>       | Italy        | Cortile della Pigna,<br>Vatican Museum    | -               | -               | -               | <b>OX346320</b> | <b>OX346319</b> | [7]        |
| <i>Mucor fragilis</i>                  | FMR 18770        | -                             | Spain        | R3                                        | <b>OX336881</b> | -               | -               | -               | -               | This study |
| <i>Mucor</i> sect. <i>Mucido</i>       | -                | -                             | Spain        | R3                                        | -               | -               | -               | -               | -               | This study |
| <i>Neocatenulostroma abietis</i>       | FMR 19657        | CBS 459.93 <sup>f</sup>       | Germany      | <i>Abies</i> sp.                          | -               | MH874081        | <b>OX431256</b> | -               | -               | [111]      |
| <i>Neocatenulostroma germanicum</i>    | FMR 19655        | CBS 539.88 <sup>f</sup>       | Germany      | Stone                                     | -               | MH873835        | <b>OX431255</b> | -               | -               | [111]      |
| <i>Neocatenulostroma microsporum</i>   | FMR 19659        | CBS 101951 <sup>f</sup>       | South Africa | <i>Protea cynaroides</i> , living<br>leaf | -               | KF901814        | <b>OX431256</b> | -               | -               | [111]      |
| <i>Neocatenulostroma pinorum</i>       | FMR 19653        | CBS 174.90 <sup>f</sup>       | France       | <i>Pinus insignis</i> , needles           | -               | GU301802        | GU371737        | -               | -               | [112]      |
| <i>Neocatenulostroma spinulosum</i>    | <b>FMR 18793</b> |                               | <b>Spain</b> | <b>S4</b>                                 | <b>OX628944</b> | <b>OX628945</b> | <b>OX628946</b> | -               | <b>OX628947</b> | This study |
| <i>Neodevriesia fraseriae</i>          | FMR 19662        | CBS 128217 <sup>f</sup>       | Australia    | <i>Melaleuca</i> sp., leaves              | <b>OX346372</b> | <b>OX346373</b> | <b>OX346372</b> | <b>OX346373</b> | -               | [113]      |
| <i>Neodevriesia longicatenulospora</i> | <b>FMR 18825</b> |                               | <b>Spain</b> | <b>P5</b>                                 | <b>OX342400</b> | <b>OX342401</b> | <b>OX342225</b> | <b>OX342226</b> | -               | This study |
| <i>Neodevriesia stirlingiae</i>        | FMR 19654        | CBS 133581 <sup>f</sup>       | Australia    | <i>Stirlingia latifolia</i> , leaves      | <b>OX346369</b> | NG_042755       | <b>OX346315</b> | <b>OX346410</b> | -               | [114]      |
| <i>Neodidymelliopsis faroknejadii</i>  | FMR 18601        | -                             | Spain        | M2                                        | -               | -               | <b>OY101426</b> | -               | -               | This study |
| <i>Neoscytalidium dimidiatum</i>       | FMR 18624        | -                             | Spain        | R4                                        | -               | -               | <b>OX345726</b> | -               | -               | This study |
| <i>Nothophoma quercina</i>             | FMR 18625        | -                             | Spain        | R4                                        | -               | -               | <b>OX345727</b> | -               | -               | This study |
| <i>Paraconiothyrium brasiliense</i>    | FMR 18712        | -                             | Spain        | P5                                        | -               | -               | <b>OX345732</b> | -               | -               | This study |
| <i>Paradevriesia holothallica</i>      | <b>FMR 18795</b> | <b>CBS 149012<sup>f</sup></b> | <b>Spain</b> | <b>P4</b>                                 | <b>OX031242</b> | <b>OX031243</b> | <b>OX031309</b> | -               | -               | This study |

|                                                |           |                         |       |                                   |                 |          |                 |                 |                 |            |
|------------------------------------------------|-----------|-------------------------|-------|-----------------------------------|-----------------|----------|-----------------|-----------------|-----------------|------------|
| <i>Paraphoma fineti</i>                        | FMR 18816 | -                       | Spain | S5                                | -               | -        | <b>OX346386</b> | -               | -               | This study |
| <i>Penicillium brevicompactum</i>              | FMR 18741 | -                       | Spain | R3                                | -               | -        | -               | <b>OX345733</b> | -               | This study |
| <i>Penicillium brevicompactum</i>              | FMR 18811 | -                       | Spain | S5                                | -               | -        | -               | <b>OX346382</b> | -               | This study |
| <i>Penicillium hordei</i>                      | FMR 18806 | -                       | Spain | S1                                | -               | -        | -               | <b>OX346381</b> | -               | This study |
| <i>Penicillium</i> sect. <i>Aspergilloides</i> | -         | -                       | Spain | R2, R3, R5, S5,                   | -               | -        | -               | -               | -               | This study |
| <i>Penicillium</i> sect. <i>Furcatum</i>       | -         | -                       | Spain | C2, P1, P5, R3, S1                | -               | -        | -               | -               | -               | This study |
| <i>Penicillium</i> spp.                        | -         | -                       | Spain | C2, M3, P4, R3, R5, S1,<br>S3, S4 | -               | -        | -               | -               | -               | This study |
| <i>Phaeococcomyces kinklidomatophilus</i>      | FMR 18615 | CBS 147696 <sup>t</sup> | Spain | P5                                | HG995431        | HG995460 | -               | -               | -               | [90]       |
| <i>Pseudoseptoria obscura</i>                  | FMR 18976 | -                       | Spain | S1                                | <b>OX346309</b> | -        | -               | -               | -               | This study |
| <i>Sordaria clematidis</i>                     | FMR 18629 | -                       | Spain | R5                                | -               | -        | -               | -               | <b>OX345729</b> | This study |
| <i>Stemphylium vesticarium</i>                 | FMR 18655 | -                       | Spain | P1                                | -               | -        | <b>OX345731</b> | -               | -               | This study |
| <i>Talaromyces ramulosus</i>                   | FMR 18654 | -                       | Spain | C4                                | -               | -        | -               | <b>OX345730</b> | -               | This study |
| <i>Talaromyces</i> sp.                         | -         | -                       | Spain | C3                                | -               | -        | -               | -               | -               | This study |
| <i>Thyridium vestitum</i>                      | FMR 19738 | -                       | Spain | R1                                | <b>OX431181</b> | -        | -               | -               | -               | This study |
| <i>Trichoderma</i> sp.                         | -         | -                       | Spain | S4                                | -               | -        | -               | -               | -               | This study |

\*See Table 1. <sup>T</sup>, type strain. New species are **in bold**. Sequences obtained in this study are **in bold**. CBS, CBS-KNAW Westerdijk Fungal Biodiversity Institute (Utrecht, Netherlands). FMR, Facultat de Medicina (Reus, Spain).

## References

7. Isola D, Zucconi L, Onofri S, Caneva G, de Hoog GS, Selbmann L. Extremotolerant rock inhabiting black fungi from Italian monumental sites. *Fungal Divers.* 2015;76:75–96. <https://doi.org/10.1007/s13225-015-0342-9>
30. de Hoog GS, Zeng JS, Harrak MJ, Sutton DA. *Exophiala xenobiotica* sp. nov., an opportunistic black yeast inhabiting environments rich in hydrocarbons. *Antonie Van Leeuwenhoek.* 2006;90:257–68. <https://doi.org/10.1007/s10482-006-9080-z>
90. Crous PW, Osieck ER, Jurjević, Boers J, Van Iperen AL, Starink-Willemse M, et al. Fungal Planet description sheets: 1284–1382. *Persoonia.* 2021;47:178–374. <https://doi.org/10.3767/persoonia.2021.47.06>
108. De Leo F, Urzì C, de Hoog GS. Two *Coniosporium* species from rock surfaces. *Stud Mycol* [Internet]. 1999;1999:70–9. Available from: [https://www.researchgate.net/publication/258925914\\_Two\\_Coniosporium\\_species\\_from\\_rock\\_surfaces](https://www.researchgate.net/publication/258925914_Two_Coniosporium_species_from_rock_surfaces)
109. Crous PW, Wingfield MJ, Carnegie AJ, Lombard L, Roux J, Barreto RW, et al. Fungal Planet description sheets : 785 – 867. *Persoonia.* 2018;41:238–417. <https://doi.org/10.3767/persoonia.2018.41.12>
110. Hughes SJ. Conidiophores, conidia, and classification. *Can J Bot.* 1953;31:577–659. <https://doi.org/https://doi.org/10.1139/b53-046>
111. Quaedvlieg W, Binder M, Groenewald JZ, Summerell BA, Carnegie AJ, Burgess TI, et al. Introducing the consolidated species concept to resolve species in the Teratosphaeriaceae. *Persoonia.* 2014;33:1–40. <https://doi.org/10.3767/003158514X681981>
112. von Arx JA, Müller E. Über die neue Ascomycetengattung *Aulographina*. *Sydowia* [Internet]. 1960;14:330–3. Available from: [https://www.zobodat.at/pdf/Sydowia\\_14\\_0330-0333.pdf](https://www.zobodat.at/pdf/Sydowia_14_0330-0333.pdf)
113. Wang MM, Shenoy BD, Li W, Cai L. Molecular phylogeny of *Neodevriesia*, with two new species and several new combinations. *Mycologia* [Internet]. 2017;109(6):965–74. Available from: <https://doi.org/10.1080/00275514.2017.1415075>
114. Crous PW, Schumacher RK, Wingfield MJ, Lombard L, Giraldo A, Christensen M, et al. Fungal systematics and evolution: FUSE 1. *Sydowia.* 2015;67(December 15):118. <https://doi.org/10.12905/0380.sydowia67-2015-0081>

**Table S2:** Geographical origin, sources, *loci* and accession numbers of nucleotide sequences of fungal strains included in the phylogenetic analysis.

| Species                                 | Culture collection      | Country      | Isolation source                          | GenBank accession numbers |           |             |
|-----------------------------------------|-------------------------|--------------|-------------------------------------------|---------------------------|-----------|-------------|
|                                         |                         |              |                                           | ITS                       | LSU       | <i>rpb2</i> |
| <i>Amycosphaerella africana</i>         | CBS 116154 <sup>T</sup> | India        | <i>Eucalyptus viminalis</i> , leaves      | KF901700                  | KF902047  | -           |
| <i>Aureobasidium pullulans</i>          | CBS 584.75 <sup>T</sup> | France       | <i>Vitis vinifera</i> , fruit             | -                         | NG_055734 | -           |
| <i>Austroafricana associata</i>         | CBS 120730 <sup>T</sup> | Australia    | <i>Corymbia henryii</i> , leaves          | -                         | KF901824  | -           |
| <i>Austroafricana parva</i>             | CBS 122892 <sup>T</sup> | Australia    | <i>Eucalyptus globulus</i> , leaves       | -                         | MH874775  | -           |
| <i>Brunneosphaeria jonkershoekensis</i> | CBS 130594              | South Africa | <i>Protea repens</i> , leaves             | NR_156244                 | NG_058654 | -           |
| <i>Capronia mansonii</i>                | CBS 101.67 <sup>T</sup> | Sweden       | <i>Populus tremula</i>                    | -                         | MH870591  | -           |
| <i>Cladophora bantiana</i>              | CBS 100429              | Unknown      | Human, brain abscess                      | KF155212                  | MH877849  | -           |
| <i>Cladophora bantiana</i>              | CBS 101158              | Japan        | Human, brain infection                    | AY857516                  | -         | -           |
| <i>Cladophora carrionii</i>             | CBS 260.83              | Uganda       | Human, skin lesion                        | MH861582                  | MH873312  | -           |
| <i>Devriesia staurophora</i>            | CBS 375.81              | Colombia     | Paramo soil                               | -                         | KF901963  | -           |
| <i>Devriesia tardicrescens</i>          | CBS 128770 <sup>T</sup> | South Africa | <i>Phaenocoma prolifera</i> , leaf bracts | NR_137771                 | NG_059091 | -           |
| <i>Dothidea sambuci</i>                 | CBS 198.58              | Switzerland  | <i>Acer pseudoplatanus</i>                | AY930109                  | AF382387  | -           |
| <i>Dothiora maculans</i>                | CBS 301.76              | Canada       | <i>Populus tremuloides</i> , leaf litter  | -                         | MH872751  | -           |
| <i>Exophiala alcalophila</i>            | CBS 122256              | Denmark      | Human, toenail                            | JF747044                  | -         | -           |
| <i>Exophiala alcalophila</i>            | CBS 521.82              | Japan        | Soil                                      | JF747042                  | -         | -           |
| <i>Exophiala alcalophila</i>            | CBS 520.82 <sup>T</sup> | Japan        | Soil                                      | NR_111624                 | NG_059189 | -           |
| <i>Exophiala angulospora</i>            | CBS 482.92 <sup>T</sup> | Japan        | Water from drinking well                  | NR_111625                 | NG_070601 | -           |
| <i>Exophiala angulospora</i>            | CBS 146.93              | Germany      | <i>Tilia platyphylla</i> , wood           | JF747053                  | -         | -           |
| <i>Exophiala angulospora</i>            | CBS 122264              | Denmark      | Human, toenail                            | JF747052                  | -         | -           |
| <i>Exophiala asiatica</i>               | CBS 122847 <sup>T</sup> | China        | Human, wound infection of tonsils         | NR_111332                 | -         | -           |
| <i>Exophiala bergeri</i>                | CBS 353.52 <sup>T</sup> | Canada       | Human, chromomycosis                      | NR_165997                 | NG_059199 | -           |
| <i>Exophiala bergeri</i>                | CBS 526.76              | USA          | Human, subepidermal cyst                  | MH861000                  | -         | -           |
| <i>Exophiala castellanii</i>            | CBS 158.58 <sup>T</sup> | Sri Lanka    | Human                                     | MH857734                  | NG_070513 | -           |
| <i>Exophiala crusticola</i>             | CBS 119970 <sup>T</sup> | USA          | Soil, biological soil crust sample        | NR_159867                 | NG_059220 | -           |
| <i>Exophiala dermatidis</i>             | CBS 109154              | South Korea  | Human, brain                              | AY857525                  | -         | -           |
| <i>Exophiala dermatidis</i>             | CBS 686.92              | Germany      | Human                                     | MF320155                  | -         | -           |

|                                    |                             |              |                                             |           |           |          |
|------------------------------------|-----------------------------|--------------|---------------------------------------------|-----------|-----------|----------|
| <i>Exophiala dermatidis</i>        | CBS 120473                  | USA          | Human, brain                                | MF320159  | -         | -        |
| <i>Exophiala dermatidis</i>        | CBS 207.35 <sup>T</sup>     | Japan        | Human, subcutaneous phaeohyphomycosis       | MH855649  | NG_059225 | -        |
| <i>Exophiala halophila</i>         | CBS 121512 <sup>T</sup>     | USA          | Human, skin axillary                        | NR_111628 | -         | -        |
| <i>Exophiala heteromorpha</i>      | CBS 633.69                  | Canada       | Railway tie, wood of <i>Pinus banksiana</i> | AY857522  | MH871160  | -        |
| <i>Exophiala heteromorpha</i>      | CBS 116.97                  | USA          | Soil polluted with petroleum                | AY857521  | -         | -        |
| <i>Exophiala jeanselmei</i>        | CBS 677.76                  | England      | Human, skin, abscess of foot                | JN625228  | -         | -        |
| <i>Exophiala jeanselmei</i>        | CBS 507.90 <sup>T</sup>     | Uruguay      | Human, mycetoma                             | NR_111129 | MH873915  | -        |
| <i>Exophiala jeanselmei</i>        | CBS 528.76                  | Unknown      | Human, skin, hand                           | AY857530  | -         | -        |
| <i>Exophiala lecanii-corni</i>     | CBS 102400                  | USA          | Air supply passed through filter            | AY857527  | -         | -        |
| <i>Exophiala lecanii-corni</i>     | CBS 232.39                  | Brazil       | Human, chromomycosis                        | FJ974061  | MH867492  | -        |
| <i>Exophiala mesophila</i>         | CBS 402.95 <sup>T</sup>     | Germany      | Silicone seal, in shower room of hospital   | NR_121461 | KX712349  | -        |
| <i>Exophiala mesophila</i>         | CBS 121507                  | USA          | Human, hair                                 | JF747120  | -         | -        |
| <i>Exophiala mesophila</i>         | CBS 836.95                  | Germany      | Slime on floor outdoor swimming-pool        | JF747112  | -         | -        |
| <i>Exophiala oligosperma</i>       | CBS 725.88 <sup>T</sup>     | Germany      | Human, tumour of sphenoidal cavity          | NR_111134 | NG_059201 | -        |
| <i>Exophiala oligosperma</i>       | CBS 658.76                  | USA          | Unknown                                     | AY857532  | -         | -        |
| <i>Exophiala oligosperma</i>       | CBS 265.49                  | France       | Honey                                       | MH856519  | MH868049  | -        |
| <i>Exophiala phaeomuriphormis</i>  | CBS 131.88 <sup>T</sup>     | Unknown      | Human, phaeohyphomycosis                    | AJ244259  | MH873815  | -        |
| <i>Exophiala spinifera</i>         | CBS 356.83                  | Egypt        | Unknown                                     | AY156961  | MH870977  | -        |
| <i>Exophiala spinifera</i>         | CBS 425.92                  | Germany      | Apple juice                                 | AY156962  | -         | -        |
| <i>Exophiala spinifera</i>         | CBS 899.68 <sup>T</sup>     | USA          | Human, nasal granuloma                      | NR_111131 | -         | -        |
| <i>Exophiala xenobiotica</i>       | CBS 117753                  | USA          | Human, leg wound                            | JN625227  | -         | -        |
| <i>Exophiala xenobiotica</i>       | CBS 117648                  | USA          | Sclera                                      | EF025407  | -         | -        |
| <i>Gonatobotryum apiculatum</i>    | CBS 182.68                  | Canada       | Soil, under <i>Pinus strobus</i>            | MH859103  | MH870816  | -        |
| <i>Helotium subcorticale</i>       | CBS 248.62                  | France       | Unknown                                     | -         | MH869740  | -        |
| <i>Hormonema macrosporum</i>       | CBS 536.94 <sup>T</sup>     | Russia       | <i>Rutilus rutilus</i> , gills              | -         | NG_064169 | -        |
| <i>Hormonema merioides</i>         | CBS 906.85 <sup>T</sup>     | Canada       | <i>Pseudotsuga menziesii</i> , needle       | MH861924  | MH873614  | -        |
| <i>Kabatina thujae</i>             | CBS 238.66 <sup>T</sup>     | Germany      | <i>Thuja occidentalis</i> , withering shoot | -         | NG_064053 | -        |
| <i>Neocatenulostroma castaneae</i> | MFLUCC 17-2188 <sup>T</sup> | Italy        | <i>Castanea sativa</i>                      | -         | NG_081524 | -        |
| <i>Neocatenulostroma pinorum</i>   | CBS 302.71                  | France       | <i>Pinus maritima</i>                       | GU214622  | GU214393  | GU371766 |
| <i>Neodevriesia agapanthi</i>      | CBS 132689 <sup>T</sup>     | South Africa | <i>Agapanthus africanus</i> , leaves        | NR_111766 | NG_042688 | -        |

|                                      |                            |              |                                                                  |           |           |   |
|--------------------------------------|----------------------------|--------------|------------------------------------------------------------------|-----------|-----------|---|
| <i>Neodevriesia bulbillosa</i>       | CBS 118285 <sup>T</sup>    | Spain        | Limestone rock, surface                                          | NR_144953 | KF310029  | - |
| <i>Neodevriesia cladophorae</i>      | CGMCC 3.17901 <sup>T</sup> | China        | <i>Cladophora</i> sp., intertidal zone                           | KU578112  | KU578114  | - |
| <i>Neodevriesia coccolobae</i>       | CBS 145064 <sup>T</sup>    | Puerto Rico  | <i>Coccoloba uvifera</i> , leaves                                | NR_161126 | NG_066285 | - |
| <i>Neodevriesia grateloupiae</i>     | CGMCC 3.14281 <sup>T</sup> | China        | <i>Grateloupia</i> sp., intertidal zone                          | KU578118  | KU578120  | - |
| <i>Neodevriesia hilliana</i>         | CBS 123187 <sup>T</sup>    | New Zeland   | <i>Macrozamia communis</i> , leaves                              | NR_145098 | MH874801  | - |
| <i>Neodevriesia imbrexigena</i>      | CAP1373 <sup>T</sup>       | Portugal     | Glazed decorative tiles in association with <i>Trebouxia</i> sp. | JX915747  | JX915751  | - |
| <i>Neodevriesia knozdavesii</i>      | CBS 122898 <sup>T</sup>    | South Africa | <i>Protea</i> sp., leaves                                        | MH863254  | MH874778  | - |
| <i>Neodevriesia lagerstroemiae</i>   | CBS 125422 <sup>T</sup>    | USA          | <i>Lagerstroemia indica</i>                                      | MH863701  | KF902149  | - |
| <i>Neodevriesia metrosideri</i>      | CBS 145084 <sup>T</sup>    | New Zeland   | <i>Metrosideros</i> sp                                           | NR_161141 | NG_066296 | - |
| <i>Neodevriesia modesta</i>          | CBS 137182 <sup>T</sup>    | Italy        | Rock                                                             | NR_144975 | MH878597  | - |
| <i>Neodevriesia queenslandica</i>    | CBS 129527 <sup>T</sup>    | Australia    | <i>Scaevola taccada</i> , leaves                                 | JF951148  | KF901839  | - |
| <i>Neodevriesia shakazului</i>       | CBS 133579 <sup>T</sup>    | South Africa | <i>Aloe</i> sp., leaves                                          | NR_111825 | NG_042753 | - |
| <i>Neodevriesia simplex</i>          | CBS 137183 <sup>T</sup>    | Italy        | Rock                                                             | NR_155464 | KF310027  | - |
| <i>Neodevriesia strelitziae</i>      | CBS 122379 <sup>T</sup>    | South Africa | <i>Strelitzia nicolai</i> , leaves                               | MH863206  | EU436763  | - |
| <i>Neodevriesia xanthorrhoeae</i>    | CBS 128219 <sup>T</sup>    | Australia    | <i>Xanthorrhoea australis</i> , leaves                           | NR_144962 | HQ599606  | - |
| <i>Paradevriesia americana</i>       | CBS 117726 <sup>T</sup>    | USA          | Air                                                              | NR_159866 | NG_059077 | - |
| <i>Paradevriesia compacta</i>        | CBS 118294 <sup>T</sup>    | Spain        | Limestone rock, surface                                          | NR_144955 | NG_059089 | - |
| <i>Paradevriesia pseudoamericana</i> | CBS 126270 <sup>T</sup>    | Germany      | <i>Malus domestica</i> , fruit surface                           | NR_171743 | NG_064229 | - |
| <i>Phaeocryptopus nudus</i>          | CBS 268.37                 | Germany      | <i>Abies balsamea</i>                                            | EU700371  | GU301856  | - |
| <i>Phialophora ellipsoidea</i>       | CBS 286.47 <sup>T</sup>    | Brazil       | Human, mycetoma hand                                             | -         | AF050282  | - |
| <i>Pseudoteratosphaeria africana</i> | CBS 144595 <sup>T</sup>    | Angola       | Leaf spot on unidentified host                                   | NR_163380 | MK442558  | - |
| <i>Pseudoteratosphaeria flexuosa</i> | CBS 111012 <sup>T</sup>    | Colombia     | <i>Eucalyptus globulus</i>                                       | -         | NG_069169 | - |
| <i>Rhinocladiella fasciculata</i>    | CBS 132.86 <sup>T</sup>    | India        | Decayed wood                                                     | -         | NG_057784 | - |
| <i>Rhizosphaera kalkhofii</i>        | ATCC 26605                 | USA          | <i>Picea pungens</i> , blue spruce needles                       | -         | EF114706  | - |
| <i>Rhizosphaera kalkhofii</i>        | ATCC 46388                 | France       | <i>Picea glauca</i> needles                                      | AY183366  | -         | - |
| <i>Rhizosphaera macrospora</i>       | CBS 208.79 <sup>T</sup>    | France       | <i>Abies alba</i> , needle on dead twig                          | NR_166003 | NG_064115 | - |
| <i>Rhizosphaera macrospora</i>       | CBS 467.82                 | Switzerland  | <i>Abies alba</i> , endophyte                                    | EU700368  | -         | - |
| <i>Rhizosphaera oudemansii</i>       | CBS 427.82                 | Switzerland  | <i>Abies alba</i> , endophyte                                    | EU700367  | -         | - |
| <i>Rhizosphaera oudemansii</i>       | CBS 226.83                 | Spain        | <i>Abies pinsapo</i> , needle                                    | EU700366  | -         | - |
| <i>Rhizosphaera pini</i>             | CBS 206.79                 | France       | <i>Abies alba</i> , needle on dead twig                          | EU700370  | -         | - |



|                                    |                         |              |                                            |           |          |          |
|------------------------------------|-------------------------|--------------|--------------------------------------------|-----------|----------|----------|
| <i>Rhizosphaera pseudotsugae</i>   | CBS 101222              | Unknown      | <i>Pseudotsuga menziesii</i> , needles     | EU700369  | -        | -        |
| <i>Roesleria subterranea</i>       | CBS 320.33              | Netherlands  | <i>Malus sylvestris</i> , root             | -         | MH866908 | -        |
| <i>Scleroconidioma sphagnicola</i> | UAMH 9731               | Canada       | <i>Sphagnum fuscum</i> , lesions on thalli | NR_121294 | -        | -        |
| <i>Stylodothis puccinioides</i>    | CBS 193.58              | Switzerland  | <i>Viburnum lantana</i>                    | KY929139  | -        | -        |
| <i>Thyrynula eucalypti</i>         | CBS 145894 <sup>T</sup> | Australia    | <i>Eucalyptus cloeziana</i> , leaves       | -         | HM535600 | MN162605 |
| <i>Thyrynula eucalyptina</i>       | CPC 13748               | Australia    | <i>Eucalyptus globulus</i>                 | -         | MN162255 | MN162608 |
| <i>Xenodevriesia strelitzicola</i> | CBS 122480 <sup>T</sup> | South Africa | <i>Strelitzia</i> sp.                      | -         | MH874744 | -        |
| <i>Xenomeris abietis</i>           | CBS 799.72              | Canada       | <i>Pseudotsuga menziesii</i>               | -         | MH872299 | -        |

<sup>T</sup>, type strain. ATCC, American Type Culture Collection (Manassas, VA, USA). CAP, Culture Collection of Alan Phillips, housed at the Lab Bugworkers | M&B-BiolSI | Tec Labs – Innovation Centre, University of Lisbon (Lisbon, Portugal). CBS, CBS-KNAW Westerdijk Fungal Biodiversity Institute (Utrecht, Netherlands). CGMCC, China General Microbiological Culture Collection Center (Beijin, China). CPC, working collection of Pedro Crous, housed at the Westerdijk Fungal Biodiversity Institute (Utrecht, Netherlands). MFLUCC, Mae Fah Luang Culture Collection (Chiang Rai, Thailand). UAMH, University of Alberta Mold Herbarium and Culture Collection (Edmonton, Canada)

**Table S3:** Carbon source assimilation.

| TEST                          | CARBON SOURCE ASSIMILATION |                  |                    |                    |                |                 |                 |                  |                                 |                   |                 |                  |                 |                 |                  |                |                |                  |                  |                                |                                |                           |                 |               |               |               |                    |                 |                 |                   |                    |                   |              |                    |                   |              |                 |               |                   |                  |                |                  |                 |                 |                   |                   |                          |                                  |                                  |   |   |
|-------------------------------|----------------------------|------------------|--------------------|--------------------|----------------|-----------------|-----------------|------------------|---------------------------------|-------------------|-----------------|------------------|-----------------|-----------------|------------------|----------------|----------------|------------------|------------------|--------------------------------|--------------------------------|---------------------------|-----------------|---------------|---------------|---------------|--------------------|-----------------|-----------------|-------------------|--------------------|-------------------|--------------|--------------------|-------------------|--------------|-----------------|---------------|-------------------|------------------|----------------|------------------|-----------------|-----------------|-------------------|-------------------|--------------------------|----------------------------------|----------------------------------|---|---|
|                               | GLY (Glycerol)             | ERY (Erythritol) | DARA (D-arabinose) | LARA (L-arabinose) | RIB (D-ribose) | DXYL (D-xylose) | LXYL (L-xylose) | ADO (D-adonitol) | MDX (methyl-4-D-xylopyranoside) | GAL (D-galactose) | GLU (D-glucose) | FRU (D-fructose) | MNE (D-mannose) | SBE (L-sorbose) | RHA (L-rhamnose) | DUL (Dulcitol) | INO (Inositol) | MAN (D-mannitol) | SOR (D-sorbitol) | MDM (methyl-D-mannopyranoside) | MDG (methyl-D-glucopyranoside) | NAG (N-acetylglucosamine) | AMY (Amygdalin) | ARB (Arbutin) | ESC (Esculin) | SAL (Salicin) | CEL (D-cellobiose) | MAL (D-maltose) | LAC (D-lactose) | MEL (D-melibiose) | SAC (D-saccharose) | TRE (D-trehalose) | INU (Inulin) | MLZ (D-melezitose) | RAF (D-raffinose) | AMD (Amidon) | GLYG (Glycogen) | XLT (Xylitol) | GEN (Gentiobiose) | TUR (D-turanose) | LYX (D-lyxose) | TAG (D-tagatose) | DFUC (D-fucose) | LFUC (L-fucose) | DARL (D-arabitol) | LARL (L-arabitol) | GNT (potassiumgluconate) | 2KG (potassium-2-keto-gluconate) | 5KG (potassium-5-keto-gluconate) |   |   |
| A. microstrictum<br>FMR 19067 | +                          | +                | -                  | +                  | +              | +               | w               | -                | -                               | -                 | w               | w                | -               | w               | +                | -              | +              | +                | +                | -                              | +                              | +                         | +               | +             | w             | +             | +                  | +               | +               | +                 | -                  | -                 | +            | +                  | w                 | +            | +               | +             | +                 | +                | -              | +                | -               | -               | w                 | w                 | w                        | -                                | w                                |   |   |
| A. pullulans<br>FMR 18808     | -                          | +                | -                  | +                  | -              | +               | w               | -                | +                               | +                 | +               | +                | w               | -               | +                | -              | +              | +                | +                | +                              | w                              | +                         | +               | +             | +             | +             | +                  | +               | +               | -                 | w                  | +                 | +            | -                  | +                 | +            | +               | +             | +                 | +                | +              | -                | -               | -               | +                 | +                 | +                        | +                                | -                                | + |   |
| C. pleiosporus<br>FMR 18827   | w                          | w                | +                  | +                  | +              | +               | -               | -                | -                               | -                 | +               | +                | +               | w               | w                | w              | w              | +                | +                | -                              | w                              | w                         | w               | -             | +             | -             | +                  | +               | +               | +                 | +                  | +                 | +            | w                  | +                 | -            | w               | w             | w                 | +                | +              | -                | w               | -               | w                 | w                 | w                        | +                                | -                                | - |   |
| E. caementiphila<br>FMR 18977 | +                          | -                | -                  | -                  | -              | w               | -               | w                | -                               | w                 | +               | +                | +               | +               | -                | -              | w              | +                | w                | -                              | -                              | -                         | +               | +             | -             | w             | w                  | -               | w               | -                 | -                  | w                 | -            | -                  | -                 | -            | w               | w             | w                 | +                | -              | +                | -               | -               | +                 | +                 | +                        | +                                | -                                | + |   |
| E. multiformis<br>FMR 18809   | +                          | -                | -                  | w                  | +              | +               | +               | +                | -                               | -                 | +               | +                | +               | +               | +                | +              | -              | +                | +                | w                              | +                              | +                         | +               | +             | +             | -             | +                  | +               | +               | +                 | +                  | +                 | +            | +                  | +                 | +            | +               | +             | +                 | +                | +              | +                | +               | -               | +                 | +                 | +                        | +                                | -                                | + |   |
| E. xenobiotica<br>FMR 18810   | +                          | -                | -                  | w                  | -              | +               | -               | w                | w                               | +                 | +               | +                | +               | +               | -                | -              | w              | -                | -                | +                              | +                              | -                         | -               | -             | -             | -             | -                  | w               | w               | w                 | +                  | +                 | +            | +                  | -                 | -            | -               | +             | -                 | +                | +              | +                | +               | w               | +                 | w                 | +                        | -                                | w                                | - | - |
| E. xenobiotica<br>FMR 19066   | +                          | +                | +                  | -                  | +              | -               | -               | -                | +                               | +                 | +               | +                | +               | -               | -                | -              | -              | -                | -                | -                              | -                              | w                         | w               | +             | +             | +             | +                  | +               | w               | -                 | w                  | +                 | +            | -                  | -                 | +            | +               | +             | +                 | +                | +              | w                | +               | w               | w                 | -                 | w                        | -                                | -                                | - | - |
| E. xenobiotica<br>CBS 118157  | +                          | +                | +                  | -                  | +              | -               | -               | -                | +                               | +                 | +               | +                | +               | -               | -                | -              | -              | -                | -                | -                              | -                              | w                         | w               | +             | +             | +             | +                  | +               | w               | -                 | w                  | +                 | +            | +                  | -                 | -            | +               | +             | +                 | +                | w              | +                | w               | w               | -                 | w                 | -                        | -                                | -                                | - |   |

|                                                 |   |   |   |   |   |   |   |   |   |   |   |   |   |   |   |   |   |   |   |   |   |   |   |   |   |   |   |   |   |   |   |   |   |   |   |   |   |   |   |   |   |   |   |   |   |   |   |   |
|-------------------------------------------------|---|---|---|---|---|---|---|---|---|---|---|---|---|---|---|---|---|---|---|---|---|---|---|---|---|---|---|---|---|---|---|---|---|---|---|---|---|---|---|---|---|---|---|---|---|---|---|---|
| <i>K. epidermidis</i><br>FMR 18978              | - | + | w | + | w | - | + | + | + | - | + | + | + | - | - | - | w | - | - | - | + | - | - | + | + | - | + | - | - | - | - | - | - | - | - | - | - | w | + | + | + |   |   |   |   |   |   |   |
| <i>K. perfecta</i><br>FMR 18715                 | + | - | - | + | - | + | - | w | - | w | - | - | + | + | - | - | - | + | + | - | w | - | - | - | - | w | + | - | - | - | - | - | - | - | - | - | - | - | - | - | - | - |   |   |   |   |   |   |
| <i>P. kinklidomatop<br/>hilus</i><br>CBS 147696 | + | - | - | + | - | + | - | + | - | - | w | w | w | - | - | - | - | + | + | - | - | - | - | - | - | - | + | + | - | + | + | + | - | w | + | w | + | - | w | + | - | - | - | - | - | - | - | - |

+, growth. w, slow or low growth. -, no-growth.

**Table S4:** Nitrogen source assimilation, osmotolerance, cycloheximide resistance, urease and DNase production, acid from glucose and sugar fermentation for the fungal strains tested.

| TEST                                | NITROGEN SOURCE ASSIMILATION |                  |                   |                                    |          |            |          |              |           |           |             |          |      |       |      |      |      |      |      |      | GLUCOSE ASSIMILATION |     |     |     |       |       |      |         |           |          | OSMOTOLE-RANCE |         | CICLOHEXI-MIDE TOLERANCE |           | UREASE | DNase | ACID PRODUCTION | CARBON SOURCE FERMENTATION |        |  |  |  |  |  |  |  |  |
|-------------------------------------|------------------------------|------------------|-------------------|------------------------------------|----------|------------|----------|--------------|-----------|-----------|-------------|----------|------|-------|------|------|------|------|------|------|----------------------|-----|-----|-----|-------|-------|------|---------|-----------|----------|----------------|---------|--------------------------|-----------|--------|-------|-----------------|----------------------------|--------|--|--|--|--|--|--|--|--|
|                                     |                              |                  |                   |                                    |          |            |          |              |           |           |             |          |      |       |      |      |      |      |      |      |                      |     |     |     |       |       |      |         |           |          |                |         |                          |           |        |       |                 |                            |        |  |  |  |  |  |  |  |  |
|                                     | STRAIN                       | KNO <sub>3</sub> | NaNO <sub>2</sub> | (NH4) <sub>2</sub> SO <sub>4</sub> | L-Lysine | Creatinine | Creatine | L-Tryptophan | L-Proline | L-Leucine | L-Ornithine | Arginine | 0.1% | 0.25% | 0.5% | 1.0% | 2.0% | 3.0% | 4.0% | 5.0% | 7.5%                 | 10% | 50% | 60% | 0.01% | 0.05% | 0.1% | Glucose | Galactose | Sacarose | Maltose        | Lactose | Raffinose                | Trehalose |        |       |                 | Manose                     | Inulin |  |  |  |  |  |  |  |  |
| A. microstrictum<br>FMR 19067       | w                            | -                | +                 | +                                  | +        | w          | +        | +            | +         | +         | +           | w        | +    | +     | +    | +    | +    | +    | +    | +    | +                    | +   | +   | -   | -     | -     | +    | -       | +         | +        | w              | +       | +                        | w         | +      | +     | +               |                            |        |  |  |  |  |  |  |  |  |
| A. pullulans<br>FMR 18808           | +                            | +                | +                 | +                                  | -        | w          | +        | +            | +         | +         | +           | w        | +    | +     | +    | +    | +    | +    | +    | +    | +                    | +   | w   | -   | -     | -     | +    | -       | +         | +        | +              | +       | +                        | w         | +      | +     | +               | +                          |        |  |  |  |  |  |  |  |  |
| C. pleiosporus<br>FMR 18827         | -                            | -                | -                 | -                                  | w        | -          | w        | +            | w         | -         | w           | +        | +    | +     | +    | +    | +    | +    | +    | +    | +                    | w   | w   | -   | -     | -     | -    | -       | +         | +        | -              | +       | +                        | -         | +      | w     | w               | -                          |        |  |  |  |  |  |  |  |  |
| E. caementiphila<br>FMR 18977       | -                            | -                | w                 | -                                  | -        | +          | +        | +            | +         | +         | +           | w        | w    | w     | +    | +    | +    | +    | +    | w    | +                    | -   | -   | -   | -     | -     | +    | -       | -         | +        | +              | w       | w                        | +         | w      | +     | w               | w                          |        |  |  |  |  |  |  |  |  |
| E. multiformis<br>FMR 18809         | +                            | +                | +                 | +                                  | +        | +          | +        | +            | +         | +         | +           | +        | +    | +     | +    | +    | +    | +    | +    | +    | +                    | -   | -   | -   | -     | -     | +    | -       | -         | +        | w              | w       | +                        | -         | w      | +     | +               | w                          |        |  |  |  |  |  |  |  |  |
| E. xenobiotica<br>FMR 18810         | +                            | +                | +                 | +                                  | +        | +          | +        | +            | +         | +         | +           | +        | +    | +     | +    | +    | +    | +    | +    | +    | +                    | w   | -   | -   | -     | -     | +    | -       | -         | +        | +              | +       | +                        | +         | w      | +     | +               | w                          |        |  |  |  |  |  |  |  |  |
| E. xenobiotica<br>FMR 19066         | +                            | +                | +                 | +                                  | +        | +          | +        | +            | +         | +         | +           | +        | +    | +     | +    | +    | +    | +    | +    | +    | +                    | w   | +   | +   | +     | +     | +    | -       | -         | +        | w              | +       | +                        | +         | +      | +     | +               | w                          |        |  |  |  |  |  |  |  |  |
| E. xenobiotica<br>CBS 118157        | +                            | +                | +                 | +                                  | +        | +          | +        | +            | +         | +         | +           | +        | +    | +     | +    | +    | +    | +    | +    | +    | +                    | w   | +   | +   | +     | +     | -    | -       | +         | +        | +              | +       | +                        | +         | +      | +     | +               |                            |        |  |  |  |  |  |  |  |  |
| K. epidermidis<br>FMR 18978         | +                            | +                | +                 | +                                  | +        | +          | +        | +            | +         | +         | +           | +        | +    | +     | +    | +    | +    | +    | +    | +    | +                    | w   | -   | +   | +     | +     | w    | -       | -         | w        | -              | +       | w                        | -         | w      | w     | w               | -                          |        |  |  |  |  |  |  |  |  |
| K. perfecta<br>FMR 18715            | -                            | -                | -                 | -                                  | -        | -          | -        | -            | -         | -         | -           | +        | +    | w     | w    | w    | w    | w    | w    | w    | w                    | -   | -   | -   | -     | -     | -    | -       | -         | -        | -              | -       | -                        | -         | -      | -     | -               |                            |        |  |  |  |  |  |  |  |  |
| P. kinklidomatophilus<br>CBS 147696 | -                            | -                | -                 | -                                  | -        | -          | -        | -            | -         | -         | -           | +        | w    | w     | +    | +    | +    | +    | +    | +    | +                    | -   | -   | -   | -     | -     | -    | -       | -         | -        | -              | -       | -                        | -         | -      | -     | -               |                            |        |  |  |  |  |  |  |  |  |

+ = growth, w = slow or low growth, - = no-growth.

**Table S5:** Halotolerance, thermotolerance, pH tolerance, and gelatinase production for the fungal strains tested.

[illegible]

|                                                       |   |   |   |   |   |   |   |   |   |            |                 |                 |                        |                   |   |   |   |   |   |   |   |   |   |   |   |   |   |   |          |
|-------------------------------------------------------|---|---|---|---|---|---|---|---|---|------------|-----------------|-----------------|------------------------|-------------------|---|---|---|---|---|---|---|---|---|---|---|---|---|---|----------|
| <i>E. xenobiotica</i><br>CBS 118157                   | + | + | - | + | + | + | + | + | - | 4 ±<br>0.0 | 7.5<br>±<br>0.5 | 9.5<br>±<br>0.5 | 15.<br>5 ±<br>0.5      | 10<br>± 1         | - | - | - | - | + | + | + | + | + | + | + | + | + | - | -        |
| <i>K. epidermidis</i><br>FMR 18978                    | + | - | - | + | + | + | + | + | - | -          | 6 ±<br>0.0      | 9.5<br>±<br>0.5 | 14.<br>5 ±<br>0.5      | 10.<br>5 ±<br>0.5 | - | - | - | - | w | + | + | + | + | + | + | + | + | - | -        |
| <i>K. perfecta</i><br>FMR 18715                       | - | - | - | + | w | - | - | - | - | -          | 3.5<br>±<br>0.5 | 3 ±<br>0.0      | 2 ±<br>0.0             | -                 | - | - | - | - | - | + | + | + | + | + | + | + | + | + | -        |
| <i>P. kinklidomatophi</i><br><i>lus</i><br>CBS 147696 | - | - | - | w | - | - | - | - | - | -          | 2.5<br>±<br>0.5 | 2.5<br>±<br>0.5 | 2.7<br>5 ±<br>0.2<br>5 | -                 | - | - | - | - | + | + | + | w | - | - | - | - | - | - | ±<br>0.5 |

+ = growth, w = slow or low growth, - = no-growth, mm = millimeters.
